# Supplementary material
Source: PubMed Central journal article supplement (PMC8633061)
Supplement: NIHMS1741682-supplement-Supplement_Digital_Content.pdf [file NIHMS1741682-supplement-Supplement_Digital_Content.pdf]

## SUPPLEMENTAL METHODS

### *Neighborhood-level Characteristics*

Neighborhood variables at the census tract level included a range of sociodemographic characteristics and neighborhood physical characteristics. The following neighborhood sociodemographic characteristics were included: percent male, percent 65 years of age or older, percent owner-occupied housing units, racial/ethnic composition (percent Hispanic, percent non-Hispanic Black), education (percent bachelor's degree or higher), percent 21-64 years of age with a disability, percent 65 years of age or older with a disability, and economic indicators (percent unemployed, log median household income, percent households receiving public assistance, percent families living in poverty, percent 65+ population living in poverty).

In addition, we assessed physical features of the neighborhood related to population density, housing density, and street connectivity. Housing density was operationalized as number of housing units per square mile. Street connectivity was assessed with three measures: median block length (per 1,000 feet), alpha (the ratio of the actual number of complete loops to the maximum number of possible loops given the number of intersections), and gamma (the ratio of actual street segments to maximum possible given the number of intersections). Higher ratios for alpha and gamma, and lower values of block length, indicate greater connectivity.

During the 1990s, when many HRS participants were enrolled, annual measures at the tract level for the entire country are not available. For this reason, neighborhood characteristics were drawn from the 2000 Decennial Census and linked to HRS participants based on census tract of residence in 2000.

### *Evaluation of Model Performance*

We conducted formal evaluations of model performance. To do so, we first split the sample into a random 70% subsample (the “training set”) and a 30% subsample (the “test set”). We sampled by household rather than respondent ID, since spouses of HRS respondents may also be included in the data set. We then fit regressions on the training set (logistic regressions for binary outcomes, linear regressions for continuous outcomes). We used coefficients from these models to predict outcomes among those in the test set. For binary outcomes, we used the actual and predicted outcomes to calculate sensitivity, specificity, accuracy, and Brier scores. For continuous outcomes, we obtained R-squared values by regressing the predicted values on the actual values in the test set. While no set of predictors demonstrated consistently improved performance across different outcomes (eTables 4-6), these evaluations were limited in part by the relatively small size of the sample (N = 7,522 for White participants and 1,198 for Black participants).

**eTable 1. Percent of variance explained by demographic, socioeconomic, and genetic covariates among white participants**

| Model Covariates              | <b>R<sup>2</sup> (95% Confidence Interval)</b> |                      |                   |                |                   |                          |                   |
|-------------------------------|------------------------------------------------|----------------------|-------------------|----------------|-------------------|--------------------------|-------------------|
|                               | <i>Diabetes</i>                                | <i>Heart disease</i> | <i>Depression</i> | <i>Smoking</i> | <i>BMI</i>        | <i>Total cholesterol</i> | <i>HDL</i>        |
| Demographic                   | 1.2 (0.7, 1.7)                                 | 5.3 (4.3, 6.3)       | 2.5 (1.8, 3.2)    | 4.9 (3.9, 5.8) | 5.6 (4.6, 6.6)    | 8.0 (6.8, 9.2)           | 7.5 (6.2, 8.8)    |
| Demographic + SEP             | 2.2 (1.5, 2.9)                                 | 6.7 (5.6, 7.8)       | 6.9 (5.8, 8.0)    | 6.6 (5.5, 7.7) | 8.1 (6.9, 9.3)    | 8.4 (7.2, 9.6)           | 9.8 (8.4, 11.2)   |
| Demographic + PCs             | 1.5 (1.0, 2.0)                                 | 5.6 (4.6, 6.6)       | 3.0 (2.2, 3.8)    | 5.4 (4.4, 6.4) | 5.9 (4.9, 6.9)    | 8.1 (6.9, 9.3)           | 7.8 (6.5, 9.1)    |
| Demographic + PGS             | 2.2 (1.5, 2.9)                                 | 5.6 (4.6, 6.6)       | 3.8 (3.0, 4.6)    | 6.2 (5.1, 7.3) | 11.9 (10.5, 13.3) | 8.6 (7.4, 9.8)           | 9.3 (7.9, 10.7)   |
| Demographic + PCs + PGS       | 2.8 (2.1, 3.5)                                 | 6.0 (5.0, 7.0)       | 4.0 (3.1, 4.9)    | 6.5 (5.4, 7.6) | 12.5 (11.1, 13.9) | 8.7 (7.5, 9.9)           | 9.6 (8.2, 11.0)   |
| Demographic + SEP + PCs + PGS | 3.7 (2.9, 4.5)                                 | 7.4 (6.3, 8.5)       | 8.0 (6.8, 9.0)    | 8.1 (6.9, 9.3) | 14.3 (12.8, 15.8) | 9.0 (7.7, 10.3)          | 11.6 (10.1, 13.1) |

N = 7,522. Percent of variance explained is the adjusted R-squared value from a multivariate linear regression of the given outcome on the given combination of covariates. BMI: body mass index; HDL: high-density lipoprotein cholesterol; PCs: principal components for genetic ancestry; PGS: polygenic score specific to relevant health condition; SEP: socioeconomic position.

**eTable 2. Percent of variance explained by demographic, socioeconomic, and genetic covariates among Black participants**

| Model Covariates              | <b>R<sup>2</sup> (95% Confidence Interval)</b> |                      |                   |                 |                  |                          |                |
|-------------------------------|------------------------------------------------|----------------------|-------------------|-----------------|------------------|--------------------------|----------------|
|                               | <i>Diabetes</i>                                | <i>Heart disease</i> | <i>Depression</i> | <i>Smoking</i>  | <i>BMI</i>       | <i>Total cholesterol</i> | <i>HDL</i>     |
| Demographic                   | 2.4 (0.7, 4.1)                                 | 1.8 (0.3, 3.3)       | 2.0 (0.4, 3.6)    | 6.9 (4.1, 9.7)  | 8.1 (5.2, 11.0)  | 3.1 (1.1, 5.1)           | 3.4 (1.1, 5.7) |
| Demographic + SEP             | 4.2 (1.8, 6.6)                                 | 3.8 (1.5, 6.1)       | 9.2 (5.9, 12.5)   | 7.6 (4.5, 10.7) | 9.7 (6.3, 13.1)  | 4.3 (1.8, 6.8)           | 4.4 (1.7, 7.1) |
| Demographic + PCs             | 3.5 (1.5, 5.5)                                 | 2.5 (0.8, 4.2)       | 3.7 (1.6, 5.8)    | 7.5 (4.7, 10.3) | 8.2 (5.3, 11.1)  | 4.2 (1.9, 6.5)           | 4.3 (1.8, 6.8) |
| Demographic + PGS             | 2.7 (0.9, 4.5)                                 | 1.8 (0.3, 3.3)       | 3.0 (1.1, 4.9)    | 7.0 (4.2, 9.8)  | 9.0 (5.9, 12.1)  | 3.6 (1.5, 5.7)           | 3.8 (1.4, 6.2) |
| Demographic + PCs + PGS       | 4.2 (2.0, 6.4)                                 | 2.5 (0.8, 4.2)       | 3.8 (1.7, 5.9)    | 7.7 (4.8, 10.6) | 9.8 (6.7, 12.9)  | 4.7 (2.3, 7.1)           | 4.9 (2.2, 7.6) |
| Demographic + SEP + PCs + PGS | 6.1 (3.3, 8.9)                                 | 4.7 (2.2, 7.2)       | 10.3 (6.9, 13.7)  | 8.4 (5.2, 11.6) | 11.2 (7.7, 14.7) | 6.2 (3.3, 8.6)           | 6.0 (2.9, 9.1) |

N = 1,198. Percent of variance explained is the adjusted R-squared value from a multivariate linear regression of the given outcome on the given combination of covariates. BMI: body mass index; HDL: high-density lipoprotein cholesterol; PCs: principal components for genetic ancestry; PGS: polygenic score specific to relevant health condition; SEP: socioeconomic position.

**eTable 3. P-values obtained from likelihood-ratio tests between each model and the base model that included only demographic predictors, by race**

|                               | <i>Diabetes</i> | <i>Heart Disease</i> | <i>Depression</i> | <i>Smoker</i> |
|-------------------------------|-----------------|----------------------|-------------------|---------------|
| <b>White participants</b>     |                 |                      |                   |               |
| Demographic + SEP             | < 0.001         | < 0.001              | < 0.001           | < 0.001       |
| Demographic + PCs             | 0.0049          | 0.042                | < 0.001           | < 0.001       |
| Demographic + PGS             | < 0.001         | < 0.001              | < 0.001           | < 0.001       |
| Demographic + PCs + PGS       | < 0.001         | < 0.001              | < 0.001           | < 0.001       |
| Demographic + SEP + PCs + PGS | < 0.001         | < 0.001              | < 0.001           | < 0.001       |
| <b>Black participants</b>     |                 |                      |                   |               |
| Demographic + SEP             | < 0.001         | < 0.001              | < 0.001           | < 0.001       |
| Demographic + PCs             | 0.469           | 0.52                 | 0.016             | 0.6355        |
| Demographic + PGS             | 0.12            | 0.71                 | 0.0014            | 0.0413        |
| Demographic + PCs + PGS       | 0.26            | 0.60                 | 0.022             | 0.352         |
| Demographic + SEP + PCs + PGS | < 0.001         | < 0.001              | < 0.001           | < 0.001       |

N = 7,522 white and 1,198 Black participants. Underlying models involved multivariate linear regression of the given outcome on the given combination of covariates. PCs: principal components for genetic ancestry; PGS: polygenic score specific to relevant health condition; SEP: socioeconomic position.

**eTable 4. Measures of model performance for binary outcomes in the sample of white participants**

| <b>Model covariates</b>       | <b>Sensitivity</b> | <b>Specificity</b> | <b>Accuracy</b> | <b>Brier Score</b> |
|-------------------------------|--------------------|--------------------|-----------------|--------------------|
| <b>Diabetes</b>               |                    |                    |                 |                    |
| Demographic                   | 50.5               | 58.5               | 56.8            | 0.17               |
| Demographic + SEP             | 61.7               | 51.9               | 54.1            | 0.17               |
| Demographic + PCs             | 51.9               | 55.2               | 54.4            | 0.17               |
| Demographic + PGs             | 60.2               | 58.6               | 58.9            | 0.17               |
| Demographic + PCs + PGs       | 58.6               | 60.4               | 60              | 0.17               |
| Demographic + SEP + PCs + PGs | 53.7               | 61.9               | 60.2            | 0.17               |
| <b>Heart Disease</b>          |                    |                    |                 |                    |
| Demographic                   | 47.9               | 61.4               | 54.5            | 0.25               |
| Demographic + SEP             | 44.6               | 67.2               | 55.7            | 0.25               |
| Demographic + PCs             | 52.1               | 59.4               | 55.6            | 0.25               |
| Demographic + PGs             | 52.1               | 60.1               | 56.0            | 0.25               |
| Demographic + PCs + PGs       | 55.1               | 56.1               | 55.6            | 0.25               |
| Demographic + SEP + PCs + PGs | 59.0               | 52.4               | 55.7            | 0.25               |
| <b>Depression</b>             |                    |                    |                 |                    |
| Demographic                   | 53.9               | 56.9               | 55.6            | 0.24               |
| Demographic + SEP             | 55.0               | 60.0               | 58.0            | 0.24               |
| Demographic + PCs             | 60.5               | 51.4               | 55.1            | 0.24               |
| Demographic + PGs             | 57.9               | 56.2               | 56.9            | 0.24               |
| Demographic + PCs + PGs       | 54.6               | 59.3               | 57.4            | 0.24               |
| Demographic + SEP + PCs + PGs | 58.5               | 60.5               | 59.7            | 0.24               |
| <b>Smoker</b>                 |                    |                    |                 |                    |
| Demographic                   | 60.7               | 65.0               | 62.7            | 0.23               |
| Demographic + SEP             | 65.0               | 58.7               | 62.0            | 0.23               |
| Demographic + PCs             | 58.7               | 65.4               | 61.9            | 0.24               |
| Demographic + PGs             | 61.4               | 62.9               | 62.1            | 0.23               |
| Demographic + PCs + PGs       | 54.0               | 68.1               | 60.7            | 0.24               |
| Demographic + SEP + PCs + PGs | 59.1               | 63.7               | 61.3            | 0.23               |

N = 7,522. PCs: principal components for genetic ancestry; PGs: polygenic score specific to relevant health condition; SEP: socioeconomic position.

**eTable 5. Measures of model performance for binary outcomes in the sample of Black participants**

| <b>Model covariates</b>       | <b>Sensitivity</b> | <b>Specificity</b> | <b>Accuracy</b> | <b>Brier Score</b> |
|-------------------------------|--------------------|--------------------|-----------------|--------------------|
| <b>Diabetes</b>               |                    |                    |                 |                    |
| Demographic                   | 48.4               | 57.8               | 54.4            | 0.23               |
| Demographic + SEP             | 53.7               | 58.9               | 57.0            | 0.23               |
| Demographic + PCs             | 55.6               | 50.0               | 52.0            | 0.24               |
| Demographic + PGs             | 46.8               | 61.5               | 56.1            | 0.23               |
| Demographic + PCs + PGs       | 55.6               | 53.2               | 54.1            | 0.23               |
| Demographic + SEP + PCs + PGs | 54.6               | 60.4               | 58.3            | 0.23               |
| <b>Heart Disease</b>          |                    |                    |                 |                    |
| Demographic                   | 64.4               | 48.6               | 54.7            | 0.26               |
| Demographic + SEP             | 56.2               | 53.6               | 54.7            | 0.25               |
| Demographic + PCs             | 61.4               | 48.6               | 53.5            | 0.27               |
| Demographic + PGs             | 63.6               | 49.5               | 55.0            | 0.26               |
| Demographic + PCs + PGs       | 65.9               | 45.7               | 53.5            | 0.27               |
| Demographic + SEP + PCs + PGs | 57.9               | 54.7               | 56.0            | 0.26               |
| <b>Depression</b>             |                    |                    |                 |                    |
| Demographic                   | 61.6               | 46.5               | 54.7            | 0.25               |
| Demographic + SEP             | 59.7               | 65.8               | 62.7            | 0.23               |
| Demographic + PCs             | 49.2               | 61.1               | 54.7            | 0.25               |
| Demographic + PGs             | 64.3               | 50.3               | 57.9            | 0.25               |
| Demographic + PCs + PGs       | 50.8               | 60.5               | 55.3            | 0.23               |
| Demographic + SEP + PCs + PGs | 56.5               | 66.4               | 61.3            | 0.23               |
| <b>Smoker</b>                 |                    |                    |                 |                    |
| Demographic                   | 68.9               | 66.2               | 67.7            | 0.22               |
| Demographic + SEP             | 61.0               | 70.4               | 65.2            | 0.22               |
| Demographic + PCs             | 72.6               | 60.3               | 67.2            | 0.22               |
| Demographic + PGs             | 61.6               | 69.5               | 65.1            | 0.22               |
| Demographic + PCs + PGs       | 61.6               | 70.9               | 65.7            | 0.22               |
| Demographic + SEP + PCs + PGs | 61.0               | 66.7               | 63.5            | 0.23               |

N = 1,198. PCs: principal components for genetic ancestry; PGs: polygenic score specific to relevant health condition; SEP: socioeconomic position.

**eTable 6. Adjusted R-squared values obtained from regressing the predicted values from each of the models on the actual values in the random 30% subsample**

| <b>Model covariates</b>       | <b>BMI</b> | <b>Cholesterol</b> | <b>HDL</b> |
|-------------------------------|------------|--------------------|------------|
| <b>White participants</b>     |            |                    |            |
| Demographic                   | 5.9        | 5.3                | 7.7        |
| Demographic + SEP             | 7.1        | 5.6                | 7.1        |
| Demographic + PCs             | 6.0        | 5.3                | 7.2        |
| Demographic + PGs             | 10.3       | 6.0                | 8.2        |
| Demographic + PCs + PGs       | 10.8       | 6.0                | 8.2        |
| Demographic + SEP + PCs + PGs | 12.2       | 6.3                | 7.9        |
| <b>Black participants</b>     |            |                    |            |
| Demographic                   | 8.8        | 0.3                | 5.1        |
| Demographic + SEP             | 9.2        | 0.02               | 3.9        |
| Demographic + PCs             | 8.5        | 0.4                | 4.9        |
| Demographic + PGs             | 9.1        | 0.04               | 5.4        |
| Demographic + PCs + PGs       | 9.4        | 0.2                | 5.3        |
| Demographic + SEP + PCs + PGs | 9.1        | 0.01               | 4.4        |

N = 7,522 white and 1,198 Black participants. Percent of variance explained is the adjusted R-squared value from a multivariate linear regression of the given outcome on the given combination of covariates. BMI: body mass index; HDL: high-density lipoprotein cholesterol; PCs: principal components for genetic ancestry; PGs: polygenic score specific to relevant health condition; SEP: socioeconomic position.
